# Supplementary figures and images for: First Evaluation of Associated Gut Microbiota in Wild Thick-Lipped Grey Mullets (Chelon labrosus, Risso 1827)
Source: MDPI journal article supplement (doi:10.3390/fishes7040209), 2022-08-19

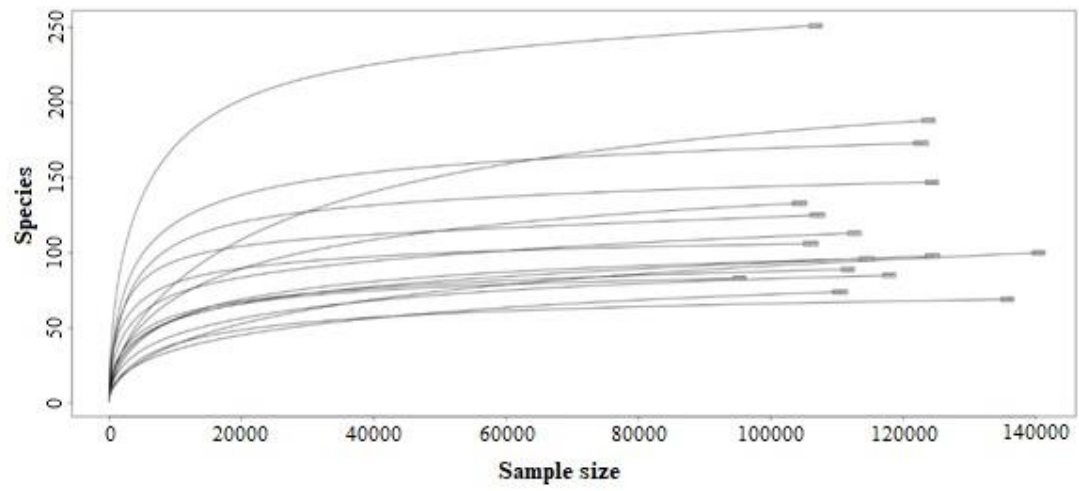

**Supplementary Figure S1.** Rarefaction curves for each fish and section.

Supplement: s1 [file s1]
